# Supplementary material for: Potential application of carbohydrate biomass in hydrometallurgy: one-pot reduction of metal oxides/salts under mild hydrothermal conditions
Source: Royal Society of Chemistry journal article supplement (doi:10.1039/d2ra01493a), 2022-01-01
Supplement: d2ra01493a1.pdf [file d2ra01493a1.pdf]

**Potential application of carbohydrate biomass in  
hydrometallurgy: One-pot reduction of metal oxides/salts  
under mild hydrothermal conditions**

*Yangyuan Zhou<sup>a</sup>, Guodong Yin<sup>b</sup>, Xu Zeng<sup>a</sup>, Jianfu Zhao<sup>a,\*</sup>, Guodong Yao<sup>a,\*</sup>*

<sup>a</sup> State Key Laboratory of Pollution Control and Resources Reuse, College of Environmental Science and Engineering, Tongji University, 1239 Siping Road, Shanghai 200092, China

<sup>b</sup> Shanghai ECH Climate Science & Technology Co. Ltd, 1230 North Zhongshan Road, Shanghai, 200437, China

**SUPPORTING INFORMATION**

This supporting information includes 22 figures. There are in total 13 pages.

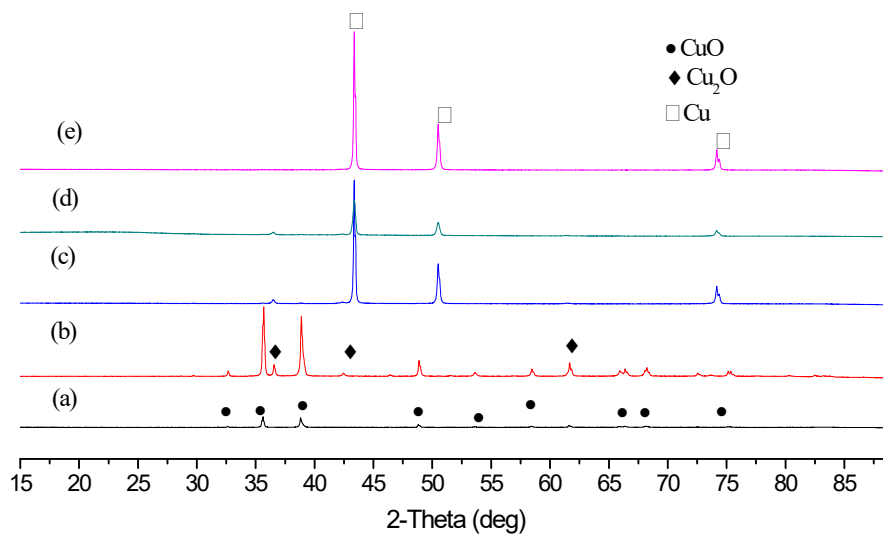

**Figure S1** XRD patterns of solid products after reactions of glucose and CuO for 3 h at different temperatures: (a) CuO; (b) 150 °C, 0.4 M NaOH; (c) 220 °C, 0.4 M NaOH; (d) 250 °C, without NaOH; (e) 250 °C, 0.4 M NaOH

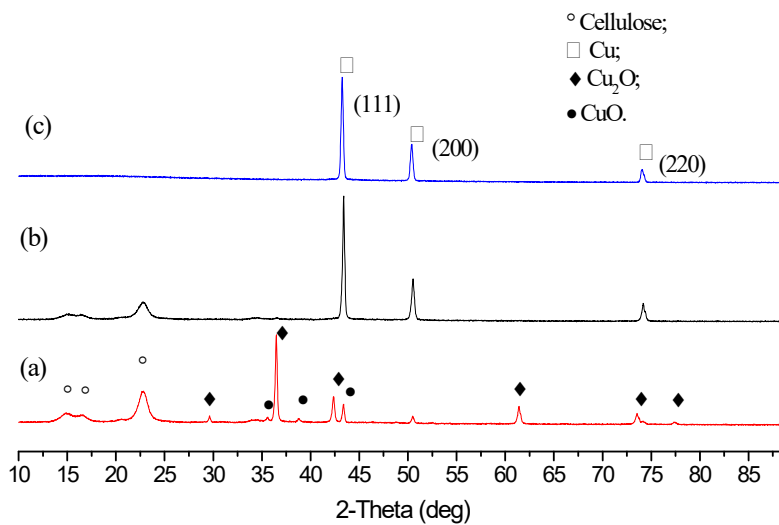

**Figure S2** XRD patterns of solid products after reactions of cellulose and CuO with (a) 220 °C, 0.4 M NaOH, 1.5 h; (b) 250 °C, 0.4 M NaOH, 1.5 h; (c) 250 °C, without NaOH, 3 h.

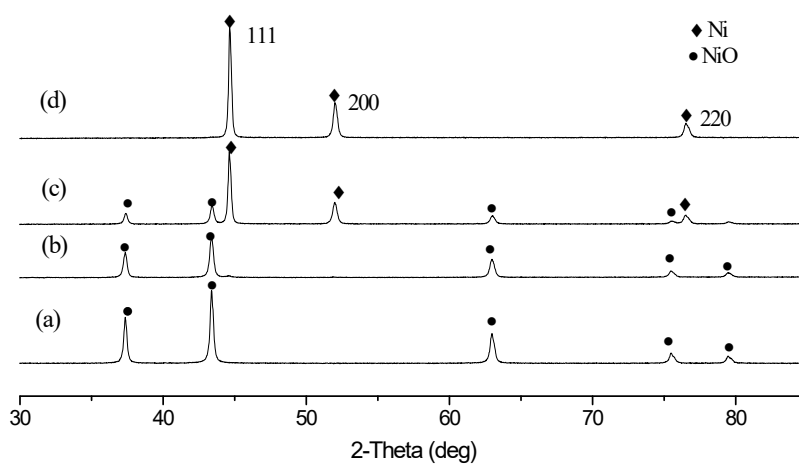

**Figure S3** XRD patterns of solid products after reactions of glucose and NiO with different reaction conditions: (a) 250 °C, without NaOH, 6 h; (b) 220 °C, 2.5 M NaOH, 6 h; (c) 250 °C, 2.5 M NaOH, 4 h; (d) 250 °C, 5 M NaOH, 4 h.

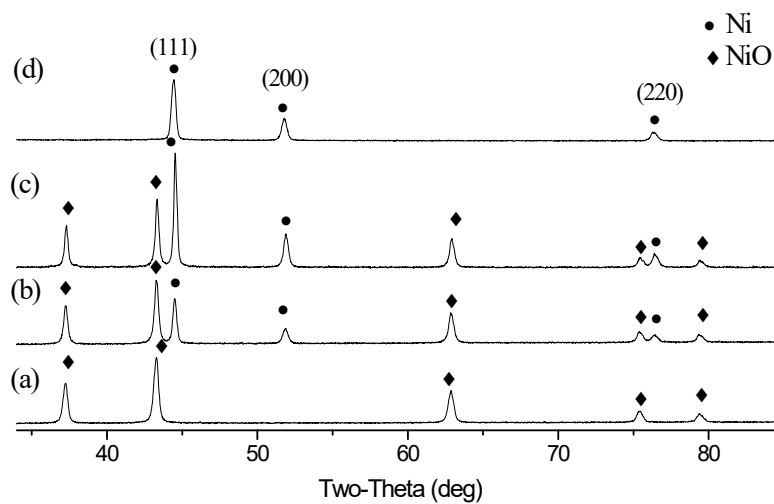

**Figure S4** XRD patterns of solid products after reactions of cellulose and NiO at 250 °C ((a) without NaOH, 6 h; (b) NaOH 2.5 M, 3 h; (c) NaOH 5 M, 3 h; (d) NaOH 5 M, 4.5 h).<sup>1</sup>

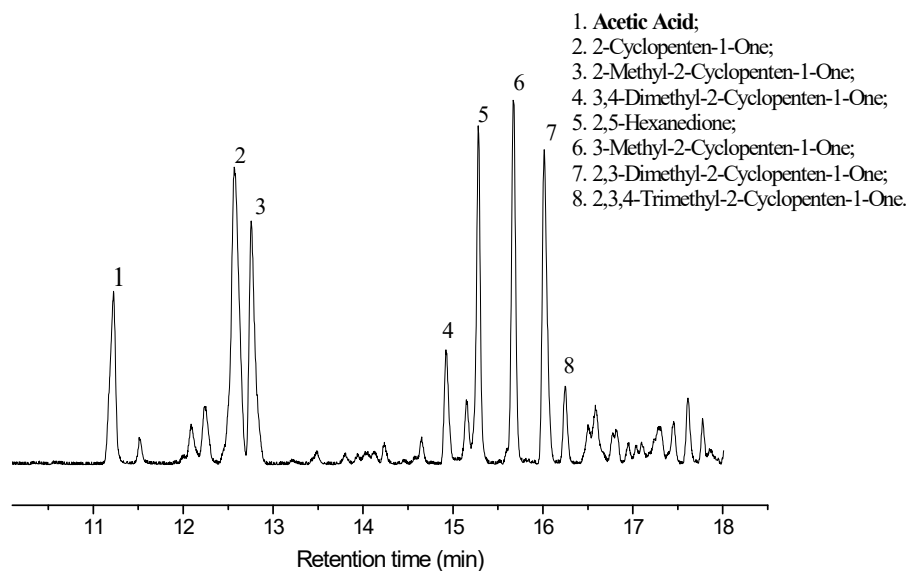

**Figure S5** GC-MS chromatogram of the sample after the reaction of glucose and CuO (250 °C, 0.4 M NaOH, 3 h).

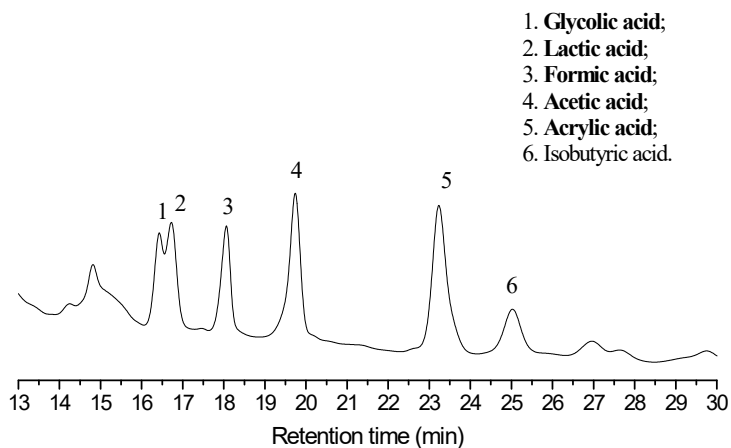

**Figure S6** HPLC chromatogram of the liquid sample after the reaction of glucose and CuO (250 °C, 0.4 M NaOH, 3 h).

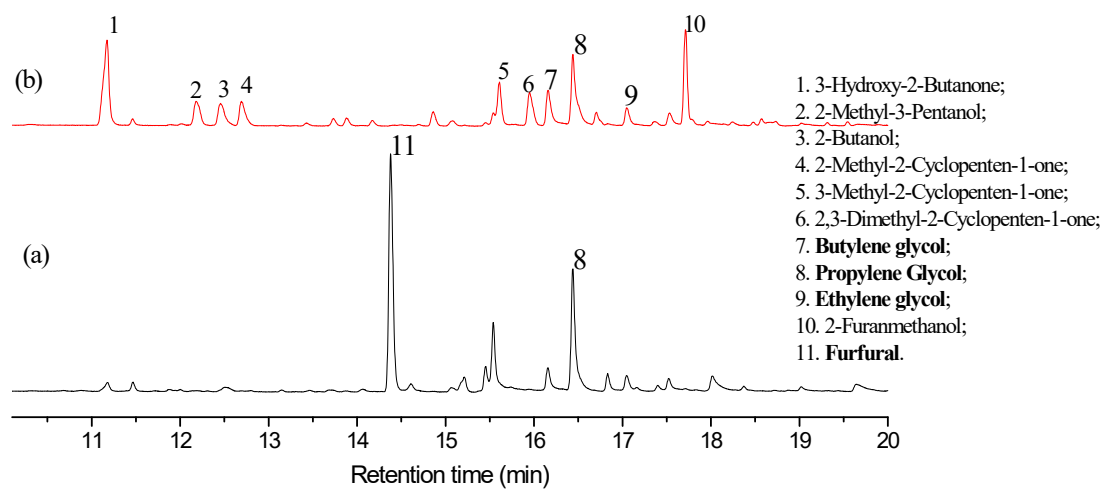

**Figure S7** GC-MS chromatograms of samples after reactions of cellulose and CuO without (a) and with 0.4 M NaOH (b) (250 °C, 1.5 h).

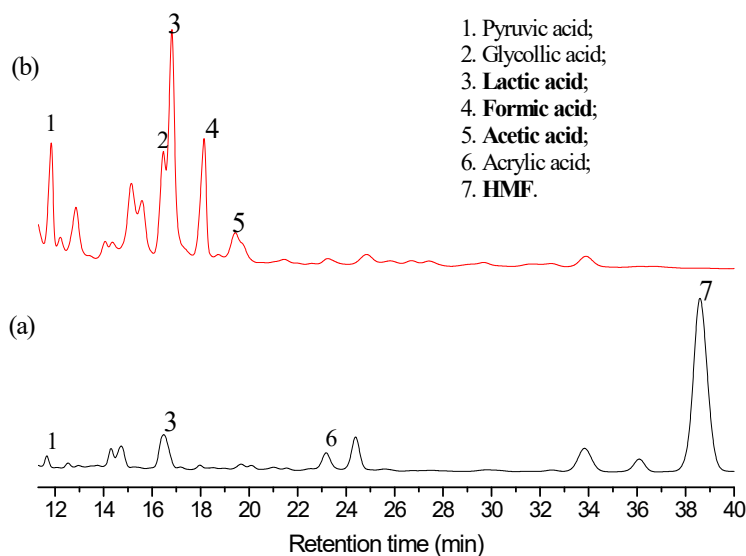

**Figure S8** HPLC chromatograms of liquid samples after the reaction of cellulose and CuO in the absence (a) and presence (b) of 0.4 M NaOH (250 °C, 1.5 h).

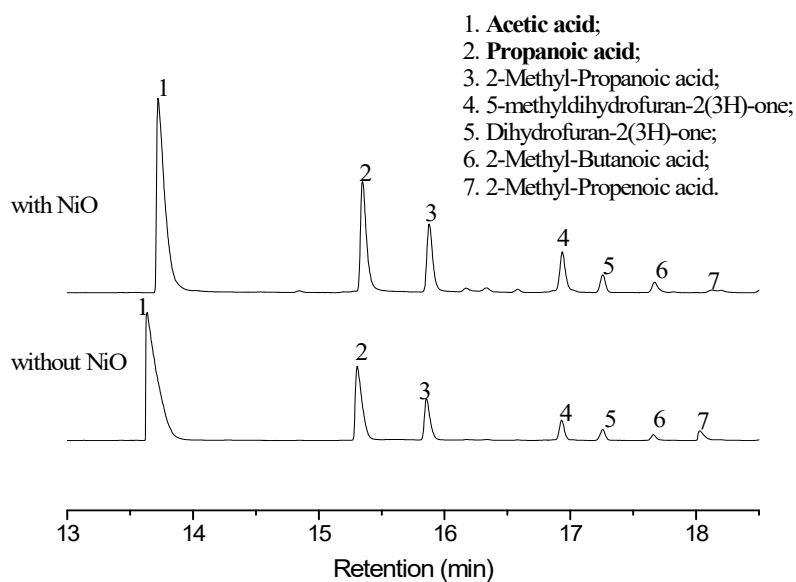

(a)

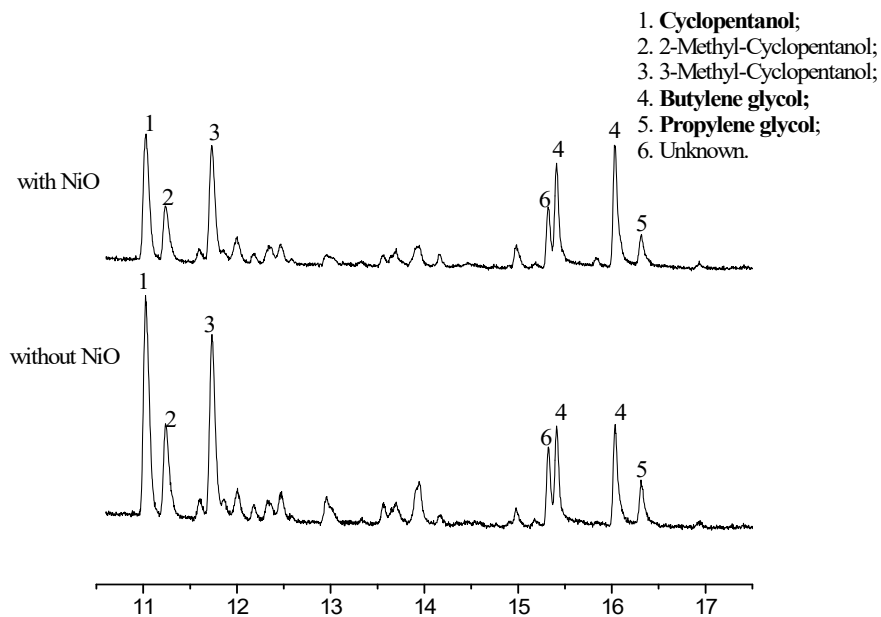

(b)

**Figure S9** GC-MS chromatograms of samples with (a) adjustment of pH by using HCl and (b) without adjustment of pH after the reaction of glucose with and without NiO (250 °C, 5 M NaOH, 4 h).

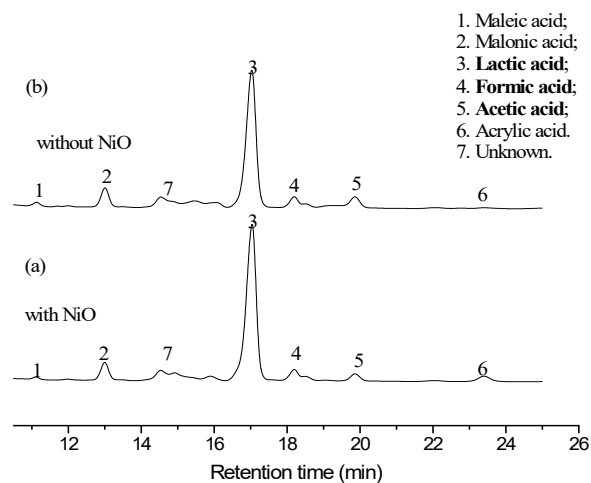

**Figure S10** HPLC chromatograms of liquid samples after the reaction of glucose with (a) and without (b) NiO (250 °C, 5 M NaOH, 4 h).

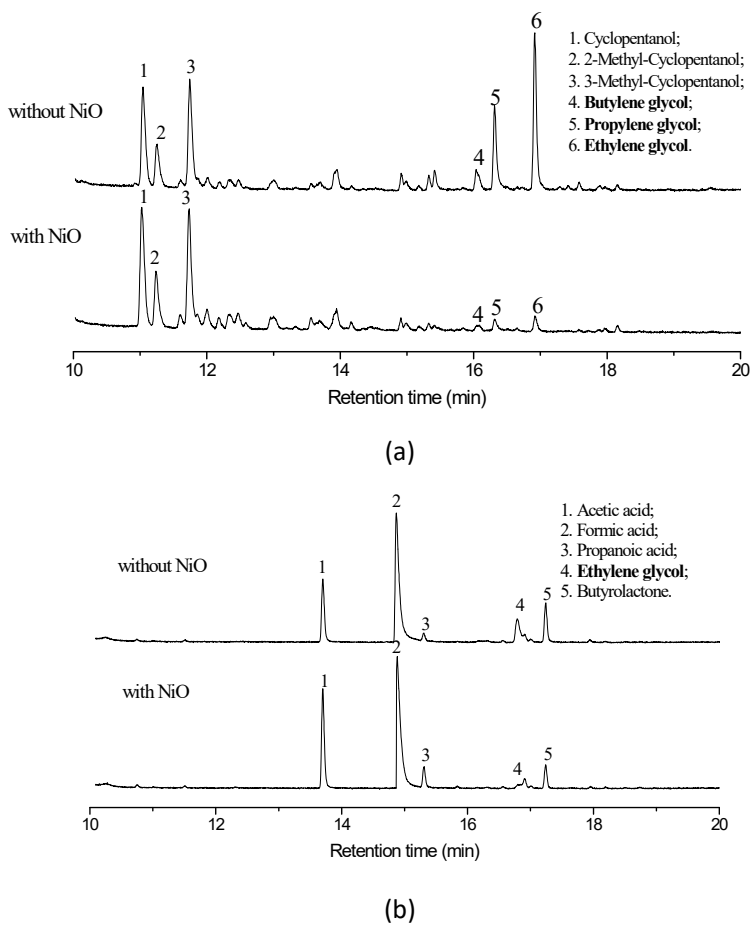

**Figure S11** GC-MS chromatograms of samples without (a) and with (b) adjustment of pH using HCl after the reaction of cellulose in the presence and absence of NiO (250 °C, 5 M NaOH, 4.5 h).<sup>1</sup>

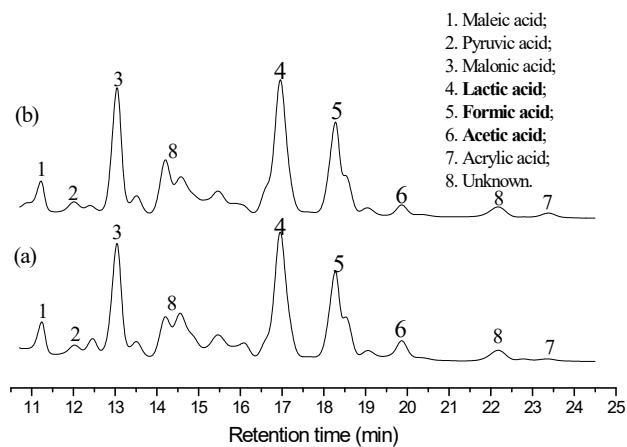

**Figure S12** HPLC chromatograms of liquid samples after reactions of cellulose in the presence (a) and absence (b) of NiO (250 °C, 5 M NaOH, 4.5 h).<sup>1</sup>

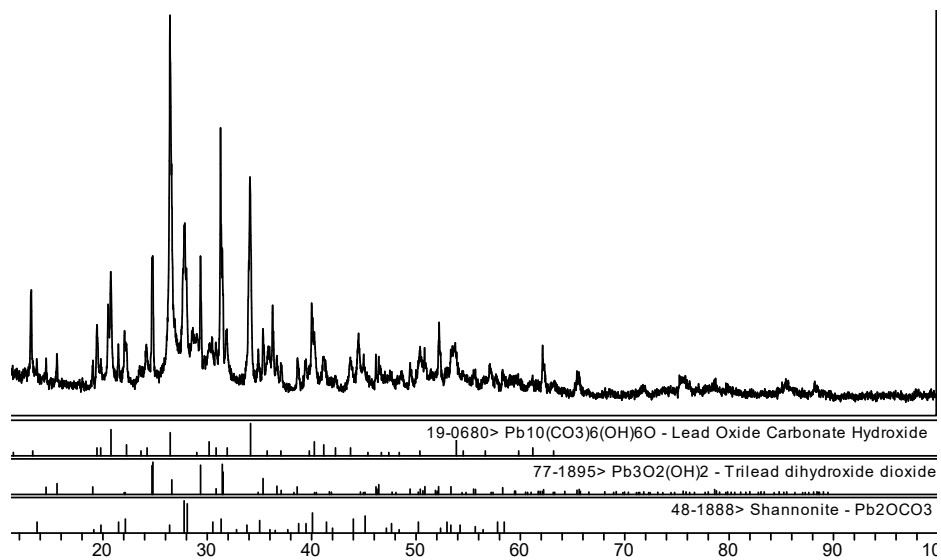

**Figure S13** XRD patterns of solid products after the reaction of 0.4 M glucose and 0.2 M PbO<sub>2</sub> (250 °C, 1 M NaOH, 6 h).



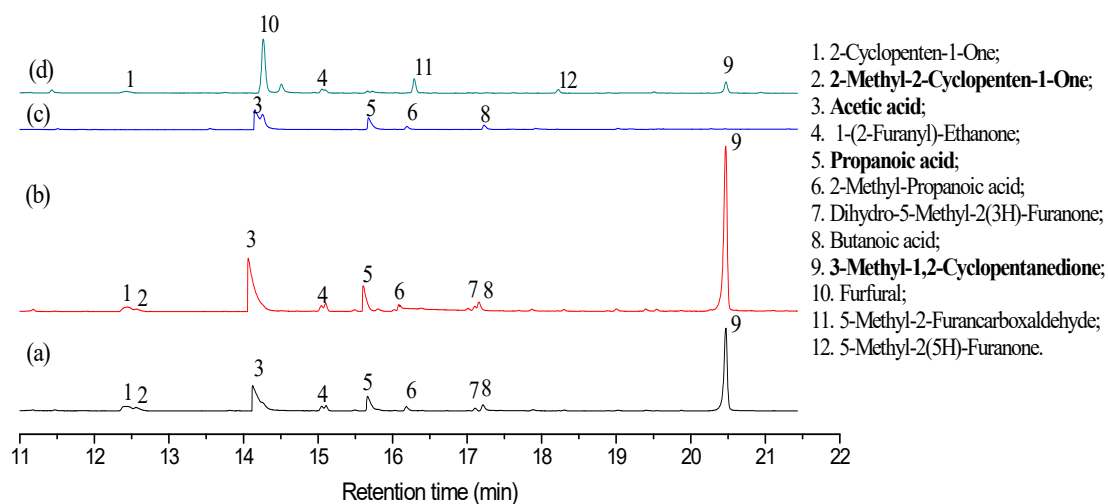

**Figure S14** GC-MS chromatograms of liquid samples after the reduction of  $\text{CuSO}_4$  (a),  $\text{CuCl}_2$  (b),  $\text{Cu}(\text{NO}_3)_2$  (c) and  $\text{Cu}_2\text{P}_2\text{O}_7$  (d) by glucose (160 °C, 6 h).

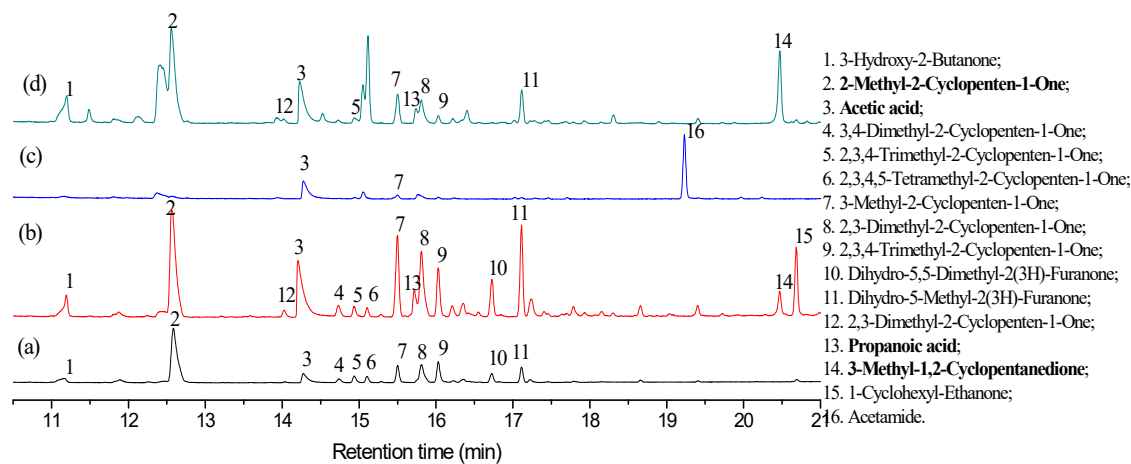

**Figure S15** GC-MS chromatograms of liquid samples after the reduction of  $\text{CuSO}_4$  (a),  $\text{CuCl}_2$  (b),  $\text{Cu}(\text{NO}_3)_2$  (c) and  $\text{Cu}_2\text{P}_2\text{O}_7$  (d) by glucose (250 °C, 3 h).

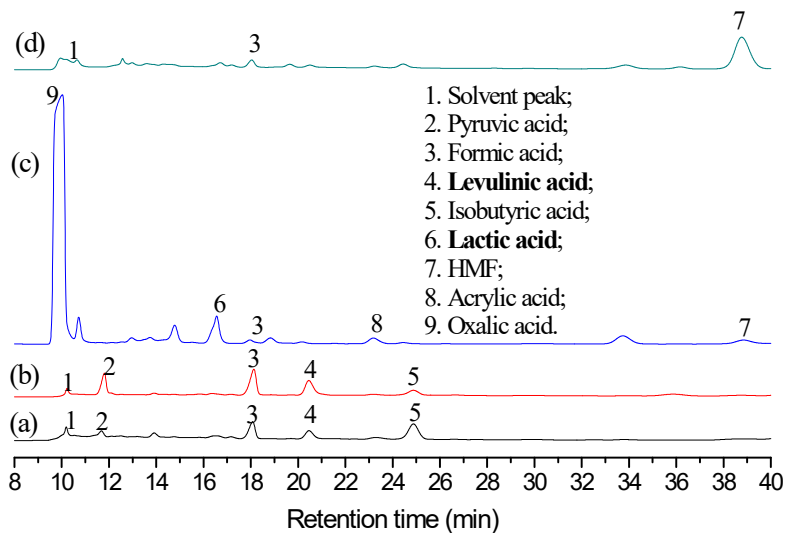

**Figure S16** HPLC chromatograms of liquid samples after the reduction of  $\text{CuSO}_4$  (a),  $\text{CuCl}_2$  (b),  $\text{Cu}(\text{NO}_3)_2$  (c) and  $\text{Cu}_2\text{P}_2\text{O}_7$  (d) by glucose (160 °C, 6 h).

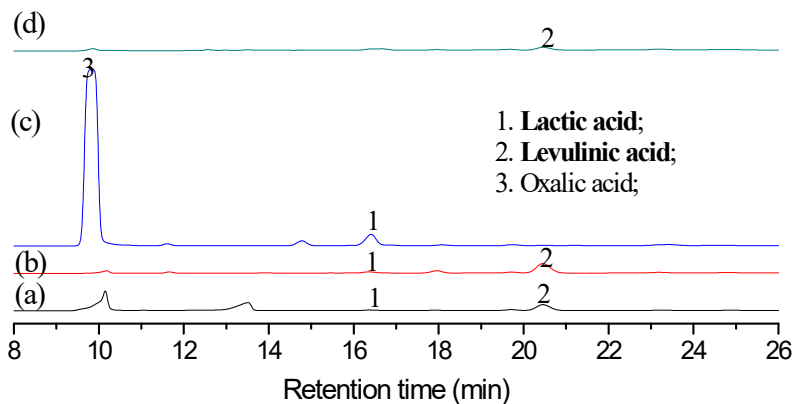

**Figure S17** HPLC chromatograms of liquid samples after the reduction of  $\text{CuSO}_4$  (a),  $\text{CuCl}_2$  (b),  $\text{Cu}(\text{NO}_3)_2$  (c) and  $\text{Cu}_2\text{P}_2\text{O}_7$  (d) by glucose (250 °C, 3 h).

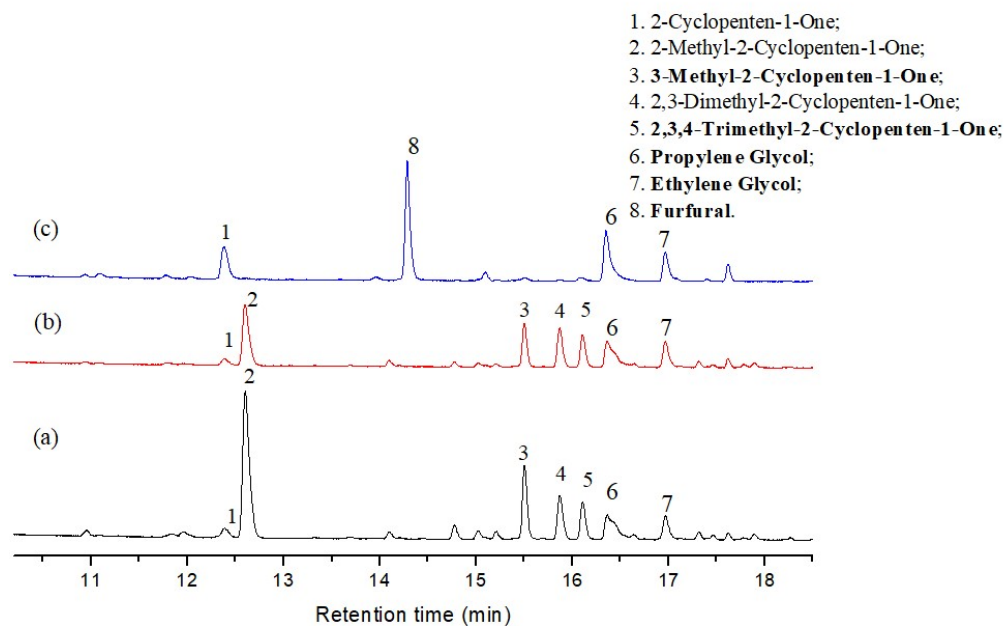

**Figure S18** GC-MS chromatograms of liquid samples after reactions of cellulose with  $\text{CuSO}_4$  (a),  $\text{CuCl}_2$  (b), and  $\text{Cu}(\text{NO}_3)_2$  (c) (250 °C, 3 h).

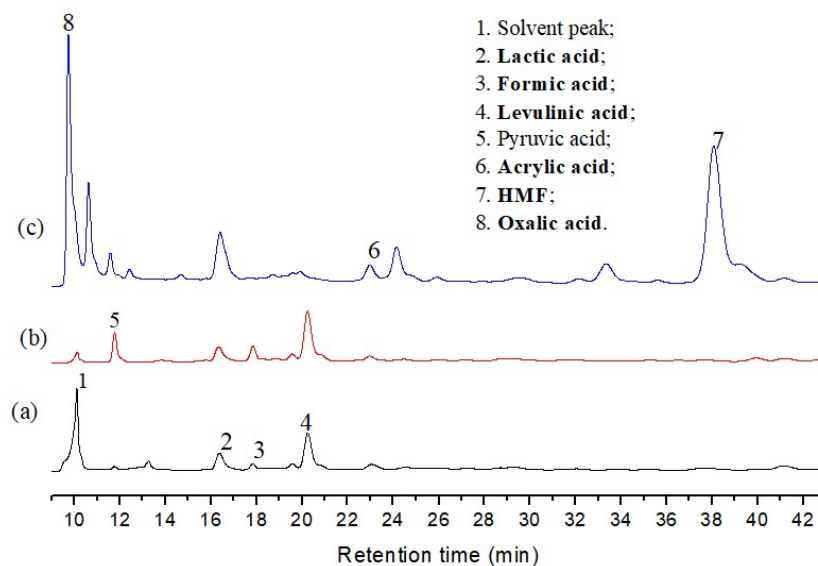

**Figure S19** HPLC chromatograms of liquid samples after reactions of cellulose with  $\text{CuSO}_4$  (a),  $\text{CuCl}_2$  (b), and  $\text{Cu}(\text{NO}_3)_2$  (c) (250 °C, 3 h).

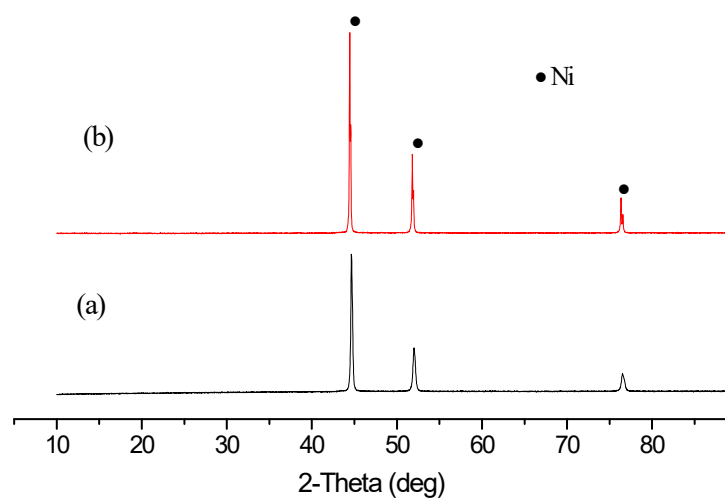

**Figure S20** XRD patterns of solid products after the reaction of Ni with 0.4 M (a) and 5 M (b) NaOH (250 °C, 3 h).

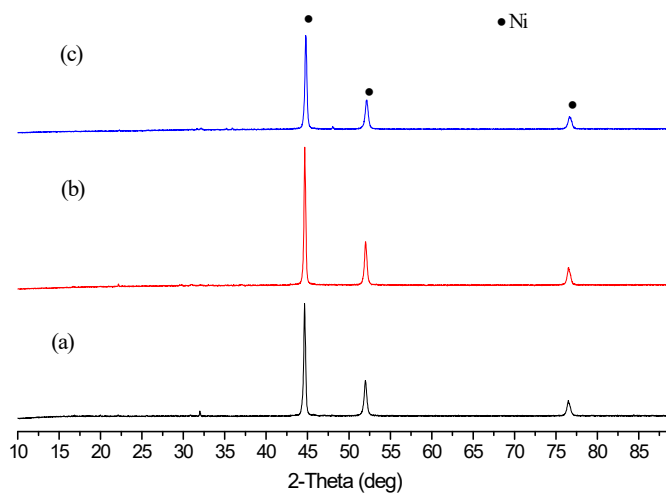

**Figure S21** XRD patterns of solid products after reduction of NiO by ethylene glycol (EG) (a), propylene glycol (PG) (b), butylene glycol (BG) (c) (250 °C, 5 M NaOH, 3 h).

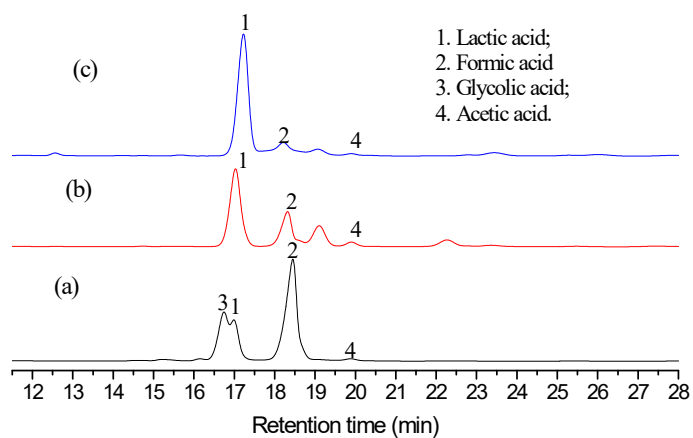

**Figure S22** HPLC chromatograms of liquid samples after reduction of NiO by EG (a), PG (b), BG (c) (250 °C, 5 M NaOH, 3 h).

#### References:

1. Yao, G.; Zeng, X.; Li, Q.; Wang, Y.; Jing, Z.; Jin, F., Direct and highly efficient reduction of nio into ni with cellulose under hydrothermal conditions. *Ind. Eng. Chem. Res.* **2012**, *51* (23), 7853-7858.
